# Supplementary material for: Phytohormones in regulation of the cell division and endoreduplication process in the plant cell cycle
Source: Royal Society of Chemistry journal article supplement (doi:10.1039/c3ra45367g), 2014-01-01
Supplement: c3ra45367g1.pdf [file c3ra45367g1.pdf]

| Sr. No.                | Cell cycle Proteins                                                                   | Functions                                                                                                                                                                      |
|------------------------|---------------------------------------------------------------------------------------|--------------------------------------------------------------------------------------------------------------------------------------------------------------------------------|
| <b>G1/S transition</b> |                                                                                       |                                                                                                                                                                                |
| 1                      | CDKF                                                                                  | It activates CDKD                                                                                                                                                              |
| 2                      | CDKD                                                                                  | CDKD activates CDKA/CYCD complex, which inturn phosphorylates RB protein                                                                                                       |
| 3                      | CYCD                                                                                  | It functions as a substrate for CDKA. It binds with CDKA and forms CDKA/CYCD complex                                                                                           |
| 4                      | CDKA                                                                                  | It is an enzyme which forms complex with CYCD and phosphorylates RB protein                                                                                                    |
| 5                      | Retinoblastoma (RB)                                                                   | Hyperphosphorylated RB protein inhibits binding of transcription factors (E2F) and the docking protein (DP)                                                                    |
| 6                      | E2FA                                                                                  | Its accumulation stimulates cell cycle progression towards S phase                                                                                                             |
| 7                      | E2FC                                                                                  | Its accumulation represses the expression of S phase genes                                                                                                                     |
| 8                      | ICK1                                                                                  | It controls the activity of CDKA/CYCD complex. Up-regulation of ICK1 expression down-regulates CDKA activity                                                                   |
| <b>G2/M transition</b> |                                                                                       |                                                                                                                                                                                |
| 1                      | Wee1                                                                                  | It maintains Tyr15 residue of CDKA in phosphorylated state. This inhibits progress of cell cycle towards M phase                                                               |
| 2                      | PAS2                                                                                  | It removes inhibitory phosphate from CDKA/CYCB complex by antiphosphorylation process and allows entry of cell cycle from G2 to M phase                                        |
| 3                      | CDKA                                                                                  | It is an enzyme which forms complex with CYCB and gives signal to CDKB/CYCB complex to initiate mitosis                                                                        |
| 4                      | CYCB                                                                                  | It functions as a substrate for CDKA. It binds with CDKA and forms CDKA/CYCB complex                                                                                           |
| 5                      | CAKs (CDKF and CDKD)                                                                  | It activates CDKA/CYCB complex                                                                                                                                                 |
| 6                      | CDKB                                                                                  | It is a mitosis inducing factor                                                                                                                                                |
| 7                      | E2FB                                                                                  | It binds with CDKB/CYCB complex and drives cell cycle towards mitosis                                                                                                          |
| 8                      | APC                                                                                   | It regulates ubiquitination and proteolysis of CYCB                                                                                                                            |
| 9                      | CDC20                                                                                 | It activates APC/C during metaphase                                                                                                                                            |
| 10                     | CDH1                                                                                  | It activates APC/C for the exit of mitosis                                                                                                                                     |
| 11                     | MAD2 (Mitotic arrest deficient 2) and BUBR1 (Budding uninhibited by benzimidazole R1) | They binds with CDC20 to activate APC/C                                                                                                                                        |
| 12                     | securin                                                                               | Degradation of securin is required for anaphase onset and activate separase enzyme. Degradation of securins is important in the spindle assembly checkpoint to ensure balanced |

|                                     |                              |                                                                                                                                                                                                                                                                                    |
|-------------------------------------|------------------------------|------------------------------------------------------------------------------------------------------------------------------------------------------------------------------------------------------------------------------------------------------------------------------------|
|                                     |                              | chromosome segregation and to avoid aneuploidy                                                                                                                                                                                                                                     |
| 13                                  | Separase                     | Activated separase enzyme cleaves the cohesion complexes, thereby allowing sister chromatid separation                                                                                                                                                                             |
| 14                                  | CYCB                         | It is a substrate required for phosphorylation of CDKB                                                                                                                                                                                                                             |
|                                     | CDKB                         | It interacts with CYCB and activates protein and expression of genes required for cytokinesis                                                                                                                                                                                      |
| 15                                  | APC/CCDC20 and APC/CCDH1     | It mediates CYCB degradation. CYCB proteolysis is required to inhibit CDKB activity and to induce different cell processes such as sister chromatid separation, disassembly of the mitotic spindle, chromosome decondensation, cytokinesis and reformation of the nuclear envelope |
| <b>Endoreduplication</b>            |                              |                                                                                                                                                                                                                                                                                    |
| 1                                   | ICK2                         | It inhibits the activity of CDKA and CDKB                                                                                                                                                                                                                                          |
| 2                                   | CDKB                         | It is a mitotic inducing factor. Decrease in its activity stimulates S-phase reentry, resulting in diversion of cell cycle towards endocycle                                                                                                                                       |
| 3                                   | CDKA                         | It is an enzyme which forms complex with CYCB and gives signal to CDKB/CYCB complex to initiate mitosis                                                                                                                                                                            |
| 4                                   | E2FB                         | It binds with CDKB/CYCB complex and drives cell cycle towards mitosis. Destruction of E2FB transcription factor in the G2 phase leads to the period of low CDKB activity. It blocks cell cycle in S-phase, coupled with attenuation of endocycle progression                       |
| 5                                   | Cul4Cdt2 E3 ubiquitin ligase | It targets E2FB for destruction                                                                                                                                                                                                                                                    |
| 6                                   | E2FA                         | E2FA during G1 phase drives CycE transcription, which activates CDKA and triggers entry into S phase and the subsequent destruction and inactivation of E2Fc by RUB-Cullin pathway                                                                                                 |
| 7                                   | E2Fc                         | Its accumulation represses the expression of S phase genes. It inhibits cell division leading to enlarged cells                                                                                                                                                                    |
| <b>RUB-CULLIN signaling pathway</b> |                              |                                                                                                                                                                                                                                                                                    |
| 1                                   | CUL1                         | It is a cell cycle regulating enzyme                                                                                                                                                                                                                                               |
| 2                                   | RUB1/NEDD8                   | It regulates CUL1 protein through neddylation activating and conjugating enzymes                                                                                                                                                                                                   |
| 3                                   | CAND1                        | an inhibitor of SCF                                                                                                                                                                                                                                                                |
| 4                                   | SKP1 and F-box               | They binds with CUL1 protein and allows the formation of SCF E3 ligase complex                                                                                                                                                                                                     |
| 5                                   | TIR1                         | It is an important protein for auxin signaling                                                                                                                                                                                                                                     |
| 6                                   | ASK1 and Atcull              | They both binds with TIR1 to form ubiquitin                                                                                                                                                                                                                                        |

|    |                      |                                                                                                                                                             |
|----|----------------------|-------------------------------------------------------------------------------------------------------------------------------------------------------------|
|    |                      | ligase complex (SCF <sub>TIR1</sub> )                                                                                                                       |
| 7  | SCF <sub>TIR1</sub>  | This functions only in the presence of auxin. It starts degradation of E2FC protein with the help of COP9 signalsome and allows cell cycle to enter S phase |
| 8  | Aux/IAA              | It acts as substrate for SCF <sub>TIR1</sub> . It interacts with SCF <sub>TIR1</sub> by direct binding with TIR1                                            |
| 9  | COP9 signalsome      | an evolutionary conserved multiprotein complex that has function in neddylation of CUL1 protein in order to allow cell cycle to enter in S phase            |
| 10 | SCF <sup>SKP2A</sup> | It degrades docking protein (DP) and helps in progress of S phase                                                                                           |
